# Supplementary material
Source: publisher figshare collection journal article supplement (https://acs.figshare.com/ndownloader/files/4595038)
Supplement: Supplementary file 1 [file 4595038]

**Supporting Information for Swalina *et al.*, “Solvation and Solvatochromism in CO<sub>2</sub> – Expanded Liquids. 3. The Dynamics of Nonspecific Preferential Solvation”**

**Analysis of DCS Atomic Charge Sets:**

We present a comparison of the energetics observed for two different DCS atomic charge distributions employed in simulations of DCS in CH<sub>3</sub>CN, CO<sub>2</sub>, and the GXL mixture where  $x_{\text{CO}_2} = 0.95$ . The first charge set, which we will denote as S-AM1, is comprised of the scaled AM1 charges described in the Simulation Models and Methods section. The S<sub>0</sub> and S<sub>1</sub> charges for the second set have been calculated using the second-order approximate coupled-cluster method<sup>1</sup> including the resolution of the identity approximation (RICC2)<sup>2, 3</sup> using the Turbomole<sup>4</sup> program. The SVP basis set was used in conjunction with optimized auxiliary basis sets<sup>5</sup> for the RI approximation. S<sub>0</sub> and S<sub>1</sub> charges were calculated with ESP fits using the method of Singh and Kollman<sup>6</sup>. This second set of charges is denoted as CC2. The CC2 and S-AM1 charge sets were both determined using the same planar *trans*-DCS structure.

**Table SI-1:** Properties of S<sub>0</sub> and S<sub>1</sub> *trans*-DCS.

| <i>method</i> | $\mu_0$ / D                           | $\mu_1$ / D               | $\Delta E$ / eV   | $f$                  |
|---------------|---------------------------------------|---------------------------|-------------------|----------------------|
| AM1/CI        | 6.21 <sup>a</sup> (8.36) <sup>b</sup> | 14.5 (20.97) <sup>b</sup> | 3.38 <sup>a</sup> | 0.96 <sup>a</sup>    |
| RICC2         | 8.46                                  | 21.67                     | 3.84              | 1.32                 |
| Experiment    | 7.0 <sup>c</sup>                      | 21 <sup>c</sup>           | 3.29 <sup>d</sup> | 0.6-0.8 <sup>e</sup> |

<sup>a</sup> Ref. <sup>7</sup> AM1 level.

<sup>b</sup> Value determined from S-AM1 charge set.

<sup>c</sup> Ref. <sup>8</sup>

<sup>d</sup> Ref. <sup>7</sup> From the absorption maximum in hexane.

<sup>e</sup> Ref. <sup>7</sup> Range observed in various solvents.

Values of S<sub>0</sub> and S<sub>1</sub> dipole moments, excitation energies and oscillator strengths for DCS are presented in Table SI-1. The difference in S<sub>0</sub> and S<sub>1</sub> dipole moments calculated using the RICC2 approach, 13.2 D, is much closer to experiment than the value from AM1/CI, which differs from experiment by ~6 D. The S-AM1 charge set produces a dipole moment change which is similar to both the experimental and RICC2 values. Differences between the experimental values for the excitation energy,  $\Delta E$ , and oscillator strength,  $f$ , compared to those calculated at the RICC2 level may be reduced by optimizing the ground state DCS structure at the same level of theory. Additional calculations to more precisely determine these trends may be undertaken, but for our present purposes, these RICC2 level calculations are sufficient.

Visual representations of the S-AM1 and CC2 charges for the S<sub>1</sub> and S<sub>1</sub> – S<sub>0</sub> differences are provided in Figure SI-1. The S<sub>1</sub> charge sets are very similar. The S<sub>1</sub> – S<sub>0</sub> charge difference sets (which are used to determine solute-solvent interactions for spectroscopic observables) possess qualitative similarities. A more quantitative comparison of all the charge sets is presented in Figure SI-2, which displays linear correlation plots between the S-AM1 and CC2 charges.

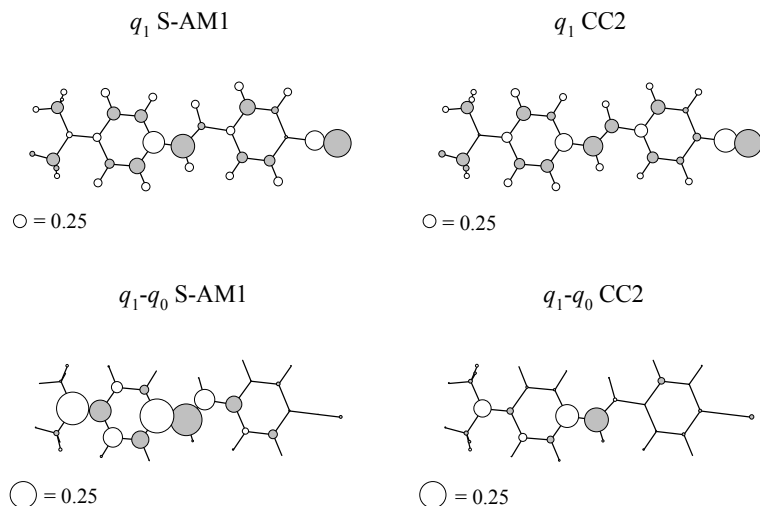

**Figure SI-1**

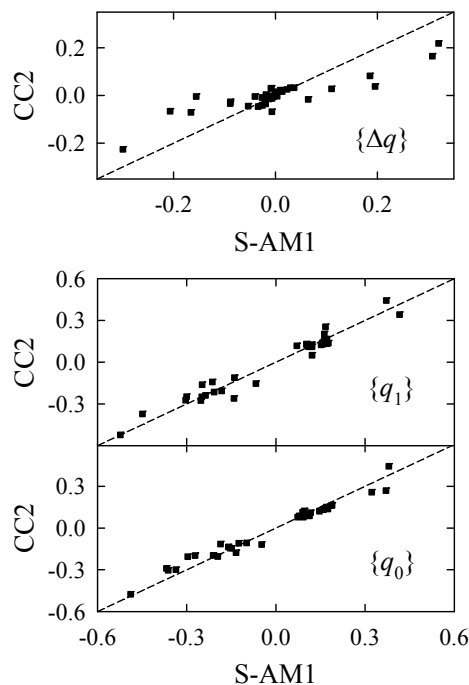

**Figure SI-2.**

Equilibrium molecular dynamics simulations of  $S_1$  DCS in  $\text{CH}_3\text{CN}$ ,  $\text{CO}_2$ , and the  $\text{CH}_3\text{CN}+\text{CO}_2$  solvent mixture ( $x_{\text{CO}_2} = 0.95$ ) were conducted using the S-AM1 and CC2 DCS charge sets under the same conditions as described in the Simulation Models and Methods section of the present paper. Tabulated simulation parameters are provided at the end of this section. Energetics obtained with the two sets of charges are presented in Table SI-2.

The largest difference in the average solute–solvent electrostatic interaction,  $\langle U_{\text{el}} \rangle_1$ , between the S-AM1 and CC2 charge sets is for  $\text{CO}_2$  – interactions between DCS and  $\text{CO}_2$  are 18% higher for the S-AM1 charge set. For the  $\text{CH}_3\text{CN}$  and  $x_{\text{CO}_2} = 0.95$  solutions,  $\langle U_{\text{el}} \rangle_1$  differs by only 1-2% between the two charge sets. This seems reasonable considering that the S-AM1 set was scaled according to the Stokes shift for neat  $\text{CH}_3\text{CN}$ .

**Table SI-2:** Comparison of energetics simulated for the  $S_1$  electronic state of DCS using the S-AM1 and CC2 DCS atomic charge sets. All values are in units of  $1000 \text{ cm}^{-1}$ .

|                        | $\{q\}$ | $-\langle U_{\text{el}} \rangle$ | $-\langle \Delta U_{\text{el}} \rangle$ | $\langle \delta \Delta U_{\text{el}}^2 \rangle / k_B T$ |
|------------------------|---------|----------------------------------|-----------------------------------------|---------------------------------------------------------|
| $\text{CH}_3\text{CN}$ | S-AM1   | 8.53                             | 3.77                                    | 3.36                                                    |
|                        | CC2     | 8.42                             | 4.19                                    | 3.52                                                    |
| $\text{CO}_2$          | S-AM1   | 2.94                             | 0.907                                   | 0.849                                                   |
|                        | CC2     | 2.49                             | 0.917                                   | 0.794                                                   |
| $x_{\text{CO}_2}=0.95$ | S-AM1   | 5.55                             | 2.46                                    | 2.60                                                    |
|                        | CC2     | 5.68                             | 2.89                                    | 2.89                                                    |

The solvent electrostatic interaction with the DCS  $S_1 - S_0$  charge differences observed in  $S_1$ ,  $\langle \Delta U_{\text{el}} \rangle_1$ , are 10% ( $\text{CH}_3\text{CN}$ ) and 15% ( $x_{\text{CO}_2} = 0.95$ ) smaller for the S-AM1 charge set. For  $\text{CO}_2$ ,  $\langle \Delta U_{\text{el}} \rangle_1$  differs by only 1% between the two charge sets. The larger  $\langle \Delta U_{\text{el}} \rangle_1$  interactions observed for the CC2 set in solutions with  $\text{CH}_3\text{CN}$  may be due to the nature of the  $\{\Delta q\}$  distribution – the S-AM1 set consists mainly of dipoles spread over the DCS framework, whereas the CC2 set contains a more localized positive charge on the dimethyl amino region (Figure SI-1). Linear response estimates for the Stokes shifts calculated from fluctuations of the solvent electrostatic interaction with the DCS  $S_1 - S_0$  charge differences observed in  $S_1$ ,  $\langle \delta \Delta U_{\text{el}}^2 \rangle_1 / k_{\text{B}}T$ , differ by 5 – 10% between the two charge sets.

Time correlation functions for  $\langle \Delta U_{\text{el}} \rangle_1$  observed in  $S_1$  using the CC2 and S-AM1 charge sets for the three solvents are presented in Figure SI-3. The TCFs for the two charge distributions are remarkably similar. Thus, despite some small differences in individual charges, the CC2 and S-AM1 charge sets produce the same Stokes shift dynamics.

Overall, the scaled AM1 charges used for our GXL work are similar to ones obtained from high-level *ab initio* electronic structure calculations at the RICC2 level. Comparable solute-solvent electrostatic interactions were observed for both charge sets for simulations of DCS+ $\text{CH}_3\text{CN}$ ,  $\text{CO}_2$ , and the  $\text{CH}_3\text{CN}+\text{CO}_2$  mixture. Most importantly, both charge sets give rise to very similar Stokes shift dynamics. This correspondence validates our use of S-AM1 charges for the analysis presented in the paper. In future work, we nevertheless recommend use of the new CC2 charge set.

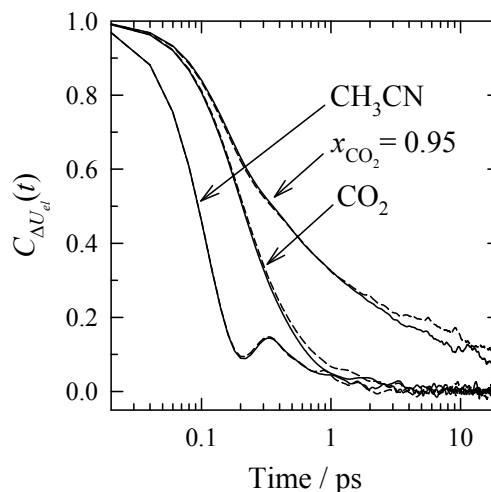

**Figure SI-3.** Time correlation functions for the electrical shift observed in  $S_1$  electronic state of DCS. Dashed lines represent values obtained using the CC2 charge set.

## References

- Christiansen, O.; Koch, H.; Jorgensen, P., The 2nd-Order Approximate Coupled-Cluster Singles and Doubles Model CC2. *Chem. Phys. Lett.* **1995**, 243, 409-418.
- Hattig, C.; Weigend, F., CC2 excitation energy calculations on large molecules using the resolution of the identity approximation. *J. Chem. Phys.* **2000**, 113, 5154-5161.
- Hattig, C.; Kohn, A., Transition moments and excited-state first-order properties in the coupled-cluster model CC2 using the resolution-of-the-identity approximation. *J. Chem. Phys.* **2002**, 117, 6939-6951.
- Ahlrichs, R. *TURBOMOLE, version 5.10*, 2008.
- Weigend, F.; Haser, M.; Patzelt, R.; Ahlrichs, R., RI-MP2: optimized auxiliary basis sets and demonstration of efficiency *Chem. Phys. Lett.* **1998**, 294, 143-152.
- Singh, U. C.; Kollman, P. A., An Approach to Computing Electrostatic Charges of Molecules. *J. Comp. Chem.* **1984**, 5, 129-145.
- Arzhantsev, S.; Zachariasse, K. A.; Maroncelli, M., Photophysics of trans-4-(Dimethylamino)-4'-cyanostilbene and Its Use as a Solvation Probe. *J. Phys. Chem. A* **2006**, 110, 3454-3470.
- Czekalla, J.; Wick, G., *Elektrochem. Angew. Phys. Chem.* **1961**, 65, 727-734.

**Table SI-3:** Parameters used for DCS/CH<sub>3</sub>CN+CO<sub>2</sub> GXL simulations. Atomic charges correspond to the CC2 charge set.

| #  | Symb. | Mol | $\varepsilon/k/K$ | $\sigma/\text{\AA}$ | Mass   | $q_0/e$   | $q_1/e$   | $\Delta q/e$ |
|----|-------|-----|-------------------|---------------------|--------|-----------|-----------|--------------|
| 1  | CA    | DCS | 35.22             | 3.55                | 12.011 | -0.107026 | -0.111463 | -0.004437    |
| 2  | CA    | DCS | 35.22             | 3.55                | 12.011 | -0.205502 | -0.273615 | -0.068113    |
| 3  | CA    | DCS | 35.22             | 3.55                | 12.011 | 0.258182  | 0.254015  | -0.004167    |
| 4  | CA    | DCS | 35.22             | 3.55                | 12.011 | -0.198068 | -0.214318 | -0.01625     |
| 5  | CA    | DCS | 35.22             | 3.55                | 12.011 | -0.109141 | -0.1426   | -0.033459    |
| 6  | CA    | DCS | 35.22             | 3.55                | 12.011 | -0.118075 | -0.153105 | -0.03503     |
| 7  | HA    | DCS | 15.1              | 2.42                | 1.008  | 0.141761  | 0.129017  | -0.012744    |
| 8  | HA    | DCS | 15.1              | 2.42                | 1.008  | 0.137558  | 0.132766  | -0.004792    |
| 9  | HA    | DCS | 15.1              | 2.42                | 1.008  | 0.144898  | 0.124166  | -0.020732    |
| 10 | HA    | DCS | 15.1              | 2.42                | 1.008  | 0.140035  | 0.136884  | -0.003151    |
| 11 | CM    | DCS | 38.24             | 3.55                | 12.011 | -0.298784 | -0.260837 | 0.037947     |
| 12 | CM    | DCS | 38.24             | 3.55                | 12.011 | -0.146219 | -0.372249 | -0.22603     |
| 13 | HA    | DCS | 15.1              | 2.42                | 1.008  | 0.150744  | 0.136347  | -0.014397    |
| 14 | HA    | DCS | 15.1              | 2.42                | 1.008  | 0.120616  | 0.146004  | 0.025388     |
| 15 | CA    | DCS | 35.22             | 3.55                | 12.011 | 0.123326  | 0.3417    | 0.218374     |
| 16 | CA    | DCS | 35.22             | 3.55                | 12.011 | -0.177002 | -0.247822 | -0.07082     |
| 17 | CA    | DCS | 35.22             | 3.55                | 12.011 | -0.289086 | -0.207125 | 0.081961     |
| 18 | CA    | DCS | 35.22             | 3.55                | 12.011 | 0.26882   | 0.203065  | -0.065755    |
| 19 | CA    | DCS | 35.22             | 3.55                | 12.011 | -0.302752 | -0.274959 | 0.027793     |
| 20 | CA    | DCS | 35.22             | 3.55                | 12.011 | -0.135428 | -0.162093 | -0.026665    |
| 21 | HA    | DCS | 15.1              | 2.42                | 1.008  | 0.134536  | 0.156885  | 0.022349     |
| 22 | HA    | DCS | 15.1              | 2.42                | 1.008  | 0.164848  | 0.156203  | -0.008645    |
| 23 | HA    | DCS | 15.1              | 2.42                | 1.008  | 0.162144  | 0.166268  | 0.004124     |
| 24 | HA    | DCS | 15.1              | 2.42                | 1.008  | 0.132036  | 0.141299  | 0.009263     |
| 25 | CZ    | DCS | 75.48             | 3.65                | 12.011 | 0.444727  | 0.44346   | -0.001267    |
| 26 | NZ    | DCS | 85.55             | 3.2                 | 14.007 | -0.475828 | -0.522593 | -0.046765    |
| 27 | NT    | DCS | 85.55             | 3.3                 | 14.007 | -0.115125 | 0.049934  | 0.165059     |
| 28 | CT    | DCS | 33.21             | 3.5                 | 12.011 | -0.196612 | -0.23859  | -0.041978    |
| 29 | HC    | DCS | 15.1              | 2.5                 | 1.008  | 0.110019  | 0.125775  | 0.015756     |
| 30 | HC    | DCS | 15.1              | 2.5                 | 1.008  | 0.08752   | 0.117333  | 0.029813     |
| 31 | HC    | DCS | 15.1              | 2.5                 | 1.008  | 0.078135  | 0.110471  | 0.032336     |
| 32 | CT    | DCS | 33.21             | 3.5                 | 12.011 | -0.204448 | -0.249162 | -0.044714    |
| 33 | HC    | DCS | 15.1              | 2.5                 | 1.008  | 0.087329  | 0.118257  | 0.030928     |
| 34 | HC    | DCS | 15.1              | 2.5                 | 1.008  | 0.113649  | 0.130175  | 0.016526     |
| 35 | HC    | DCS | 15.1              | 2.5                 | 1.008  | 0.078212  | 0.110508  | 0.032296     |
| 36 | O     | CO2 | 80.51             | 3.033               | 15.999 | -0.3256   | -0.3256   | 0            |
| 37 | C1    | CO2 | 28.13             | 2.757               | 12.011 | 0.6512    | 0.6512    | 0            |
| 38 | O     | CO2 | 80.51             | 3.033               | 15.999 | -0.3256   | -0.3256   | 0            |
| 39 | Me    | ACN | 191               | 3.6                 | 15.035 | 0.269     | 0.269     | 0            |
| 40 | C2    | ACN | 50                | 3.4                 | 12.011 | 0.129     | 0.129     | 0            |
| 41 | N     | ACN | 50                | 3.3                 | 14.007 | -0.398    | -0.398    | 0            |

**Table SI-4:** Coordinates for DCS and the S-AM1 charge set.

| #  | Symb. | $x$        | $y$        | $z$        | $q_0/e$  | $q_1/e$  | $\Delta q/e$ |
|----|-------|------------|------------|------------|----------|----------|--------------|
| 1  | C     | 12.6613038 | 8.83543481 | -8.464155  | -0.09843 | -0.13901 | -0.04059     |
| 2  | C     | 12.7211476 | 7.46384332 | -8.3192522 | -0.29631 | -0.30336 | -0.00705     |
| 3  | C     | 12.3423114 | 6.60795815 | -9.3540603 | 0.32216  | 0.16668  | -0.15548     |
| 4  | C     | 11.9225342 | 7.178034   | -10.558539 | -0.27187 | -0.20771 | 0.06416      |
| 5  | C     | 11.8569622 | 8.54692936 | -10.711574 | -0.12472 | -0.21347 | -0.08875     |
| 6  | C     | 12.2239619 | 9.38486397 | -9.6629773 | -0.0478  | -0.06706 | -0.01926     |
| 7  | H     | 12.9505047 | 9.47943526 | -7.6544791 | 0.16468  | 0.1578   | -0.00688     |
| 8  | H     | 13.0575814 | 7.04843983 | -7.3863583 | 0.17486  | 0.1716   | -0.00326     |
| 9  | H     | 11.6641535 | 6.5495271  | -11.389567 | 0.17186  | 0.15226  | -0.0196      |
| 10 | H     | 11.5333577 | 8.97105737 | -11.643998 | 0.17317  | 0.17644  | 0.00327      |
| 11 | C     | 12.411755  | 5.15080829 | -9.1370452 | -0.33642 | -0.14102 | 0.1954       |
| 12 | C     | 12.0942481 | 4.21820696 | -10.029985 | -0.14924 | -0.44869 | -0.29945     |
| 13 | H     | 12.7163264 | 4.85568328 | -8.1476959 | 0.16927  | 0.15689  | -0.01238     |
| 14 | H     | 11.9858287 | 4.5343602  | -11.054271 | 0.14643  | 0.16914  | 0.02271      |
| 15 | C     | 12.1559395 | 2.75950667 | -9.8486186 | 0.09564  | 0.41574  | 0.3201       |
| 16 | C     | 11.797476  | 1.920651   | -10.898008 | -0.134   | -0.30015 | -0.16615     |
| 17 | C     | 11.8233288 | 0.54446922 | -10.786212 | -0.36799 | -0.18257 | 0.18542      |
| 18 | C     | 12.2174961 | -0.0743169 | -9.5939977 | 0.37032  | 0.16341  | -0.20691     |
| 19 | C     | 12.6049411 | 0.76914185 | -8.5402834 | -0.36203 | -0.25212 | 0.10991      |
| 20 | C     | 12.5714732 | 2.14005837 | -8.6709754 | -0.15967 | -0.2479  | -0.08823     |
| 21 | H     | 11.4842781 | 2.35056155 | -11.834171 | 0.16056  | 0.16985  | 0.00929      |
| 22 | H     | 11.5337186 | -0.0390333 | -11.636674 | 0.18904  | 0.16239  | -0.02666     |
| 23 | H     | 12.9437983 | 0.35864781 | -7.6106237 | 0.1881   | 0.16936  | -0.01874     |
| 24 | H     | 12.8964755 | 2.73452391 | -7.836555  | 0.15811  | 0.15726  | -0.00086     |
| 25 | C     | 12.1605901 | 10.817446  | -9.8245364 | 0.37994  | 0.37117  | -0.00877     |
| 26 | N     | 12.1100786 | 11.9459981 | -9.9521561 | -0.48866 | -0.52288 | -0.03422     |
| 27 | N     | 12.2181795 | -1.453309  | -9.4551108 | -0.18583 | 0.12188  | 0.30771      |
| 28 | C     | 12.9060833 | -2.0411587 | -8.325836  | -0.21075 | -0.23655 | -0.0258      |
| 29 | H     | 12.8059737 | -3.1158225 | -8.3730586 | 0.11704  | 0.12032  | 0.00327      |
| 30 | H     | 13.9680027 | -1.7980619 | -8.3030699 | 0.07895  | 0.0707   | -0.00825     |
| 31 | H     | 12.4622452 | -1.7189581 | -7.3918739 | 0.09252  | 0.12159  | 0.02907      |
| 32 | C     | 12.087053  | -2.2719333 | -10.640892 | -0.19537 | -0.24903 | -0.05366     |
| 33 | H     | 12.8873632 | -2.1053121 | -11.361247 | 0.11316  | 0.10422  | -0.00894     |
| 34 | H     | 12.1011595 | -3.3133505 | -10.353706 | 0.09001  | 0.10309  | 0.01308      |
| 35 | H     | 11.1404702 | -2.0881949 | -11.134239 | 0.07326  | 0.10973  | 0.03647      |

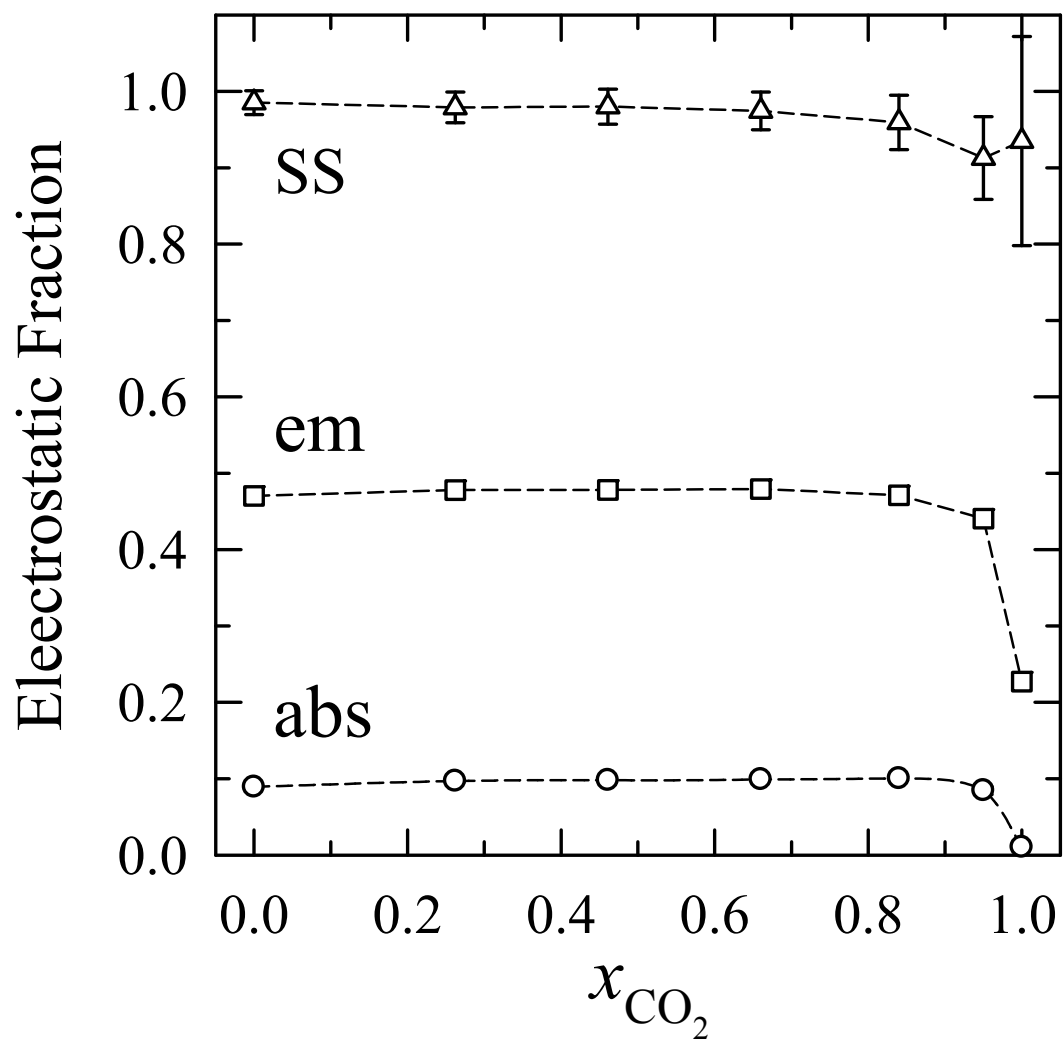

Fig. SI-4

**Figure SI-4:** Fraction of the simulated absorption (abs), emission (em), and Stokes shift (SS) contributed by electrostatic interactions as functions of composition.

## CH<sub>3</sub>CN – CH<sub>3</sub> Site Distribution

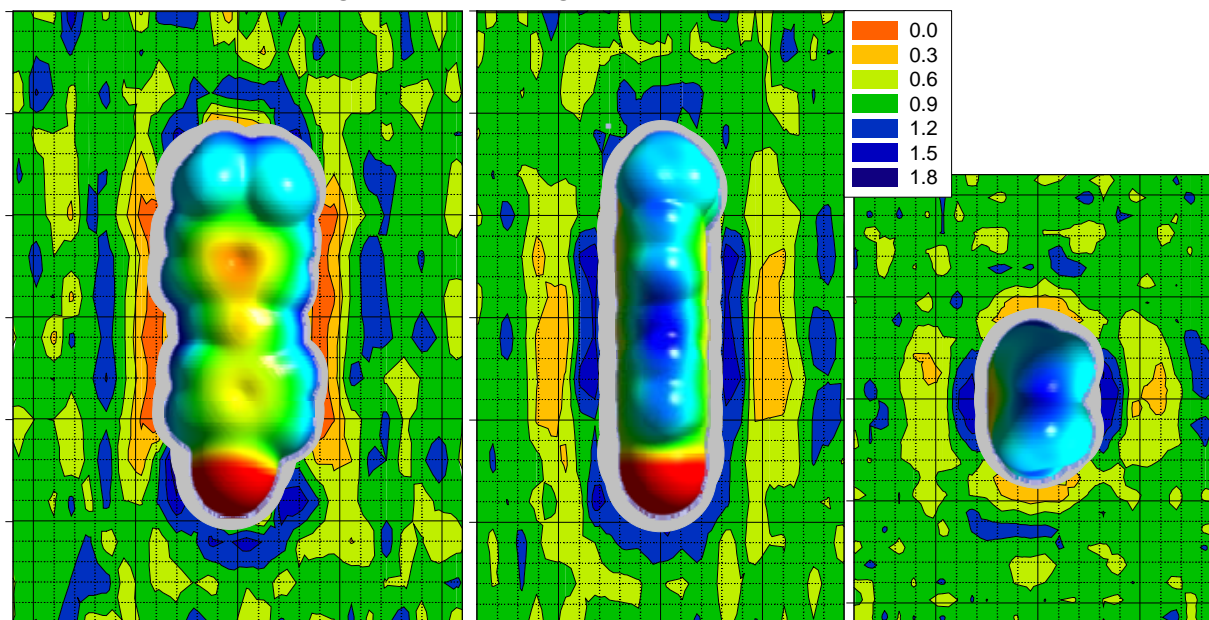

## CH<sub>3</sub>CN – N Site Distribution

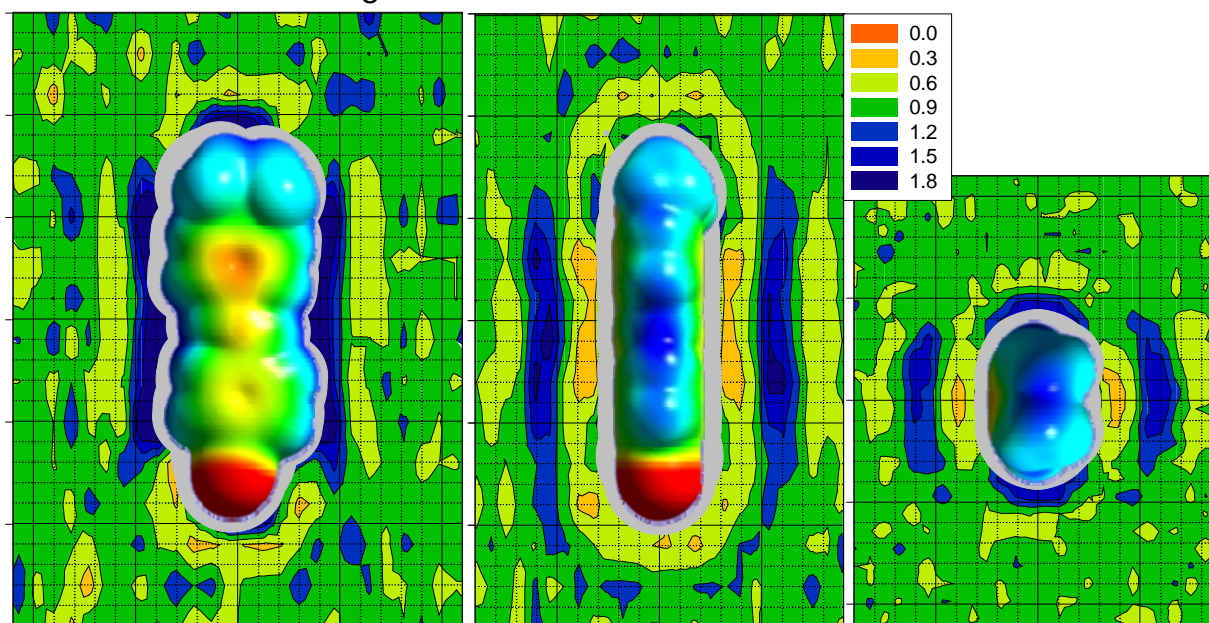

**Figure SI-5:** Enrichment factors of CH<sub>3</sub>CN atoms observed in the  $x_{\text{CO}_2} = 0.95$  system. These enrichment factors are defined as  $(N_i(\vec{r})/\Sigma_i N_i(\vec{r}))/x_i$  where  $N_i(\vec{r})$  denotes the number of atoms of type  $i$  at a location  $\vec{r}$  and  $x_i$  denotes the bulk mole fraction of such atoms. Molecule insets show an electrostatic map at the 0.004 au isodensity surface (see Fig. 10 and text).
